1 A high-throughput whole cell screen to identify inhibitors of *Mycobacterium tuberculosis*

2

3

4 Juliane Ollinger, Anuradha Kumar, David M. Roberts, Mai A. Bailey, Allen Casey and

5 Tanya Parish\*

6

7 Infectious Disease Research Institute, 1616 Eastlake Avenue E, Suite 400, Seattle,

8 Washington 98102

9

10 **Running title**

11 *M. tuberculosis* whole cell screen

12

13 **Key Words**

14 *Mycobacterium tuberculosis*, fluorescent proteins, drug discovery, high throughput assay,

15 anti-tubercular

16

17 **Declarations of interest:** none

18

19 **Corresponding author**

20 Tanya Parish

21 [Tanya.Parish@idri.org](mailto:Tanya.Parish@idri.org)

22

23 **ABSTRACT**

24 Tuberculosis is a disease of global importance for which novel drugs are urgently  
25 required. We developed a whole-cell phenotypic screen which can be used to identify  
26 inhibitors of *Mycobacterium tuberculosis* growth. We used recombinant strains of virulent  
27 *M. tuberculosis* which express far-red fluorescent reporters and used fluorescence to  
28 monitor growth *in vitro*. We optimized our high throughput assays using both 96-well and  
29 384-well plates; both formats gave assays which met stringent reproducibility and  
30 robustness tests. We screened a compound set of 1105 chemically diverse compounds  
31 previously shown to be active against *M. tuberculosis* and identified primary hits which  
32 showed  $\geq 90\%$  growth inhibition. We ranked hits and identified three chemical classes of  
33 interest – the phenoxyalkylbenzamidazoles, the benzothiophene 1-1 dioxides, and the  
34 piperidinamines. These new compound classes may serve as starting points for the  
35 development of new series of inhibitors that prevent the growth of *M. tuberculosis*. This  
36 assay can be used for further screening, or could easily be adapted to other strains of *M.*  
37 *tuberculosis*.

## 38 INTRODUCTION

39  
40 Tuberculosis (TB), caused by the bacterial pathogen *Mycobacterium tuberculosis*, is a  
41 disease of global importance which killed approximately 1.7 million people in 2016 (1). A  
42 lengthy 4-drug regimen is used to treat active infection, but drug resistant strains have  
43 emerged and threaten efforts to control the disease. Multi-drug resistant (MDR) and  
44 extremely drug resistant (XDR) TB are gaining footholds in areas where HIV is  
45 predominant and/or antibiotic treatment of patients is administered incompletely or  
46 incorrectly (1). Thus, there is an urgent need for new drugs that are effective at killing *M.*  
47 *tuberculosis* and which might shorten therapy.

48  
49 High throughput screening of small molecules has the potential to identify new compound  
50 classes that are effective against *M. tuberculosis*. Biochemical screens have been used  
51 to find inhibitors of specific targets, normally essential enzymes. A number of targets have  
52 been tested (2-15) but this approach had limited success in finding hits with whole cell  
53 activity for a variety of reasons including lack of permeation, efflux, and poor target  
54 vulnerability or engagement (16).

55  
56 In contrast, phenotypic screening relies on identifying compounds with whole cell activity  
57 from the outset, with no knowledge of the cellular target. Although there remain  
58 challenges in dealing with an organism which grows very slowly and requires handling  
59 within specialized containment facilities. A number of assays have been developed which  
60 use different approaches, for example the use of non-pathogenic surrogates such as

61 *Mycobacterium tuberculosis* H37Ra (17), *Mycobacterium smegmatis* (18) or  
62 *Mycobacterium aurum* (19). High throughput screening has been conducted with *M.*  
63 *tuberculosis* under a variety of conditions, including nutrient starvation (20), under multiple  
64 stresses (21, 22), or during infection of host cells (23, 24). Assays using live cells are also  
65 available to determine disruption of specific pathways, such as ATP homeostasis (25),  
66 pH homeostasis (26), biofilm formation (27) or under specific conditions such as low  
67 oxygen (28).

68

## 69 **MATERIAL AND METHODS**

### 70 **Bacterial strains and growth conditions**

71 *M. tuberculosis* H37Rv LP (ATCC 25618) (29) was grown in Middlebrook 7H9 medium  
72 supplemented with 10% v/v oleic acid, albumin, dextrose, catalase (OADC; Becton  
73 Dickinson), 0.05% w/v Tween 80 (7H9-OADC-Tw), and 50 µg/mL hygromycin (7H9-  
74 OADC-Tw-hyg), where required. Large scale cultures were grown in 100 mL of medium  
75 in 450 cm<sup>2</sup> roller bottles at 37°C and 100 rpm. *M. tuberculosis* strain CHEAM3 and  
76 DREAM8 expressing codon-optimized mCherry and DsRed from plasmids pCherry3 (30)  
77 and pBlazeC8 (31), respectively, were used.

78

### 79 **Preparation of assay plates**

80 Medium and compound was dispensed into sterile, black, 384-well, clear bottom plates  
81 (Greiner) using a Minitrak (Packard BioScience) with a 384-well head contained in a  
82 custom HEPA enclosure. Controls were 100 µM rifampicin in column 1 (final assay  
83 concentration of 2 µM rifampicin), DMSO in column 2 (final assay concentration 2%) and

84 125 nM rifampicin in column 23 (final assay concentration of 2.5 nM). *M. tuberculosis*  
85 culture was added to columns 1-23 using a MultiDrop Combi (Thermo Fisher); column 24  
86 was not inoculated (contamination control).

87

## 88 **Growth in plates**

89 *M. tuberculosis* was grown to logarithmic phase ( $OD_{590} = 0.6-0.9$ ) and filtered through a  
90 0.5  $\mu\text{m}$  cellulose-acetate membrane filter, diluted in fresh medium, and inoculated into  
91 96-well or 384-well plates containing medium. Plates were incubated in plastic bags in a  
92 humidified incubator at 37°C. OD and fluorescence were read using a Synergy 4 plate  
93 reader (BioTek) with excitation/emission of 586nm/614nm for mCherry and  
94 560nm/590nm for DsRed.

95

## 96 **Data Analysis**

97  $OD_{590}$  and fluorescence readouts were analyzed independently. The coefficient of  
98 variation (CV) was calculated as the standard deviation (StdDev)  $\div$  Mean. For each plate  
99 the minimum and maximum growth controls were used to determine the signal to  
100 background (S:B) ratio (calculated as  $\text{MeanMaxSignal} \div \text{MeanMinSignal}$ ), signal to noise  
101 (S:N) ratio (calculated as  $(\text{MeanMaxSignal} - \text{MeanMinSignal}) \div \text{StdDevMinSignal}$ ), and  
102 the Z' of the controls  $(1 - ((3 * \text{StdDevMaxSignal} + 3 * \text{StdDevMinSignal}) \div (\text{MeanMaxSignal} -$   
103  $\text{MeanMinSignal}))$ . For each well, the % inhibition was calculated with reference to the  
104 maximum growth control (DMSO only).

105

106 The complete data set is available at

107 [https://pubchem.ncbi.nlm.nih.gov/bioassay/1259417?viewcode=51D85DCA-C8B4-](https://pubchem.ncbi.nlm.nih.gov/bioassay/1259417?viewcode=51D85DCA-C8B4-48D9-B4BE-37687D75149B)  
108 [48D9-B4BE-37687D75149B](https://pubchem.ncbi.nlm.nih.gov/bioassay/1259417?viewcode=51D85DCA-C8B4-48D9-B4BE-37687D75149B)

109

## 110 **RESULTS AND DISCUSSION**

111

### 112 **Assay development**

113 We were interested in developing a simple whole cell screen which could be used in  
114 multiple formats to assess the anti-tubercular activity of large compound sets. We  
115 previously developed an assay to monitor growth based on fluorescence and optical  
116 density using a strain of *M. tuberculosis* constitutively expressing the far-red reporter  
117 mCherry which was robust and reproducible in 96-well format (32). In this study we used  
118 recombinant *M. tuberculosis* constitutively expressing either codon-optimized *DsRed* or  
119 mCherry to develop a 384-well high throughput assay.

120

121 We determined the minimum inhibitory concentration (MIC) for rifampicin against the  
122 parental strain (H37Rv-LP; ATCC 25618) and both the fluorescent strains (CHEAM3  
123 expressing mCherry from plasmid pCherry3, and DREAM8 expressing *DsRed* from  
124 plasmid pBlazeC8). We used a 10-point, 2-fold serial dilution in independent experiments  
125 in 96-well plates. Growth inhibition was calculated compared to control wells (DMSO),  
126 and curves fit using the Levenberg-Marquardt algorithm. For both strains, we calculated  
127 MICs using OD<sub>590</sub> and fluorescence independently and observed that the MIC for  
128 rifampicin was equivalent to the parental strain H37Rv-LP strain (Table 1). MICs derived  
129 using fluorescence as a readout were equivalent to OD<sub>590</sub>-derived values (Table 1). Once

130 we had confirmed the equivalence of the three strains in 96-well plates, we determined  
131 key parameters for transferring the assay to higher throughput in 384-well plates.

132 **Table 1. Determination of rifampicin activity against recombinant strains**

|          | MIC ( $\mu\text{M}$ ) |                       |
|----------|-----------------------|-----------------------|
|          | (OD <sub>590</sub> )  | (RFU)                 |
| H37Rv-LP | 6.6 $\pm$ 2.5 (n=85)  | <i>na</i>             |
| CHEAM3   | 7.5 $\pm$ 1.9 (n=96)  | 6.8 $\pm$ 2.2 (n=86)  |
| DREAM8   | 7.1 $\pm$ 2.2 (n=520) | 6.9 $\pm$ 2.4 (n=520) |

133 MIC, the concentration required to inhibit growth by 90%; *na*, not applicable

134

135 **Optimizing fluorescence measurements**

136 We optimized a number of parameters and variables. We had previously determined the  
137 optimal parameters for measuring mCherry fluorescence (32). For *DsRed*, we ran a set  
138 of spectral scans varying the excitation wavelength from 540 nm to 565 nm with a fixed  
139 emission of 590 nm, and varying the emission wavelength from 580 to 630 nm with a  
140 fixed excitation of 558 nm (Figs 1A and B). The signal was optimal at a range of excitation  
141 wavelengths around 560 nm, while it peaked at the emission wavelength of 592nm.  
142 Based on these scans we selected excitation and emission wavelengths of 560nm and  
143 590nm for *DsRed*.

144 **Fig 1. Optimization of fluorescence measurements.** DREAM8 was dispensed into  
145 384-well plates and fluorescence was measured at varying excitation wavelengths when  
146 the emission wavelength was fixed at 590nm (A) or at varying emission wavelengths  
147 when a fixed excitation of 558nm was used (B). Data are the average  $\pm$  SD from four  
148 wells.

149

150 We tested the alternatives of bottom and top-read optics in the plate-reader. We  
151 compared the use of an external plate shaker or the integral plate shaker in the reader.  
152 We obtained the lowest signal to noise (S:N) ratio when plates were not shaken prior to  
153 reading and when fluorescence measurements were performed using the bottom optics  
154 on the plate reader (data not shown).

155

### 156 **Optimizing inoculum and growth conditions**

157 Several additional assay parameters were tested in the 384-well plates to determine the  
158 final assay conditions; the inoculum concentration, and the number of days of incubation  
159 prior to measurement of *M. tuberculosis* growth were adjusted to minimize the assay  
160 volume while optimizing for signal and reproducibility. At a starting OD<sub>590</sub> of 0.01, growth  
161 was still logarithmic between 4 and 5 days of incubation, whereas at a higher inoculum of  
162 OD<sub>590</sub> = 0.05, cell growth plateaued at 5 days of growth (data not shown). To refine further  
163 we performed serial dilutions of CHEAM3 and monitored growth after five days of  
164 incubation. We measured fluorescence at the start of the experiment and on day 5 and  
165 calculated the S:B ratio (using the values obtained on day 0 of the experiment as the  
166 background) (Fig 2A). Wells with starting densities of 0.02 - 0.03 gave the highest S:B  
167 (Fig 2A). We ran a similar experiment using starting inocula of 0.01, 0.02 and 0.03 and  
168 incubated for 4 or 5 days, but we measured the ratio between full growth and complete  
169 inhibition using 2 µM rifampicin (Fig 2B); we found a higher ratio using OD<sub>590</sub> of 0.02-0.03  
170 (ratio of 13.0 and 13.8 respectively). However, variation was greater using the larger  
171 inoculum of OD<sub>590</sub>=0.03, with a coefficient of variance (CV) of 9%, as compared to a CV



172 of 5% for the inoculum at  $OD_{590}=0.02$ . Thus a starting  $OD_{590}$  of 0.02 produced the best  
173 signal window and reproducibility in the 384-well assay.

174 **Fig 2. Optimization of growth conditions.** (A) Serial dilutions of CHEAM3 were plated  
175 in triplicate in a 384 well plate and measured for fluorescence before and after five days  
176 of incubation. The signal to background (S:B) for each inoculum was calculated (average  
177 signal  $D0 \div$  average signal  $D5$ ) to identify the greatest amplitude to measure growth of cells  
178 over the course of 5 days. (B) 320 experimental wells of a 384 well plate were inoculated  
179 with CHEAM3 diluted to a starting  $OD_{590}$  of 0.01, 0.02 or 0.03. Plates were read on D4  
180 and D5. The average fluorescence for each condition ( $n=320$ ) was plotted, with error bars  
181 indicating the standard deviation. The calculated signal to background (S:B) is shown  
182 above each bar.

183 Our final assay conditions were to inoculate 10  $\mu$ L of *M. tuberculosis* at  $OD_{590} = 0.06$  into  
184 384-well plates prefilled with 20  $\mu$ L of medium to give a final theoretical  $OD_{590}$  of 0.02.  
185 Plates were incubated for 5 days at 37°C and both fluorescence and  $OD_{590}$  measured.

186

### 187 **Validation of 384-Well Plate Assay**

188 Once the assay conditions were optimized, we assessed reproducibility according to  
189 NCGC guidelines (33). Assay plates containing 20  $\mu$ L of 7H9-Tw-OADC medium were  
190 prepared in a sterile environment. For validation, DMSO or test compounds were added  
191 to wells and the plates were inoculated with 10  $\mu$ L of *M. tuberculosis* at an  $OD_{590}$  of 0.06.  
192 The final volume in each well was 30  $\mu$ L, the final  $OD_{590}$  was 0.02, and the final  
193 concentration of DMSO in each well was 2%. Plates were incubated for five days at 37°C  
194 in a humidified incubator. The plate layout was arranged as 320 sample wells in columns

195 3-22. The remaining four columns were reserved for plate controls: Column 1 - minimum  
196 signal (2  $\mu$ M rifampicin); Column 2 - maximum signal (DMSO); Column 23 - midpoint  
197 signal (2.5 nM rifampicin); Column 24 – contamination control (medium only, no  
198 inoculum). To test assay reproducibility, we ran a set of six plates independently on three  
199 days; two plates of minimum signal, two plates, of maximum signal and two plates of  
200 midpoint signal (Fig 3). The % growth in each well was calculated with reference to the  
201 maximum signal (Column 2).

202 **Fig 3. High throughput screen validation scatter plots:** Two plates each of containing  
203 minimum, midpoint, and maximum signal controls were run in 384-well plates on three  
204 separate days using the final assay conditions. Recombinant *M. tuberculosis* expressing  
205 (A) DsRed or (B) mCherry was grown for 5 days. Relative fluorescence units (RFU) were  
206 measured in each well.

207  
208 For each strain 2 plates containing maximum signal (Max = *M. tuberculosis* grown with  
209 2% DMSO), mid signal (Mid = *M. tuberculosis* grown in the presence of 2.5 nM rifampicin),  
210 and minimum signal (Min = *M. tuberculosis* in the presence of 2  $\mu$ M rifampicin) were run  
211 on three separate days. Max and Min controls (n=16) from within each plate were used  
212 to calculate the signal to noise ratio (S:N), signal to background ratio (S:B), and Z' factor  
213 (measure of assay robustness as defined earlier). Intraplate controls were also used to  
214 calculate the % growth in each well. For the 320 sample wells in each individual plate the  
215 average signal, percent coefficient of variance (% CV) of the signal, and average %  
216 growth were calculated. The assay statistics generated to validate these two high  
217 throughput screens are shown in Tables 2A and B.

218 **Table 2. High throughput screen validation statistics.**

**A. DREAM8 validation**

*intra-plate controls*

| Signal | Day | Plate | S:N | S:B | Z'   | Avg Signal (RFU) | % CV | % growth |
|--------|-----|-------|-----|-----|------|------------------|------|----------|
| Max    | 1   | 1     | 169 | 13  | 0.90 | 12.8             | 6.9  | -0.4     |
| Max    | 1   | 2     | 261 | 13  | 0.89 | 12.8             | 6.5  | -0.4     |
| Max    | 2   | 1     | 189 | 14  | 0.93 | 13.0             | 8.4  | -0.1     |
| Max    | 2   | 2     | 127 | 14  | 0.91 | 13.4             | 7.8  | 0.3      |
| Max    | 3   | 1     | 119 | 14  | 0.87 | 12.5             | 7.8  | 0.0      |
| Max    | 3   | 2     | 187 | 15  | 0.83 | 12.3             | 7.4  | 0.1      |
| Mid    | 1   | 1     | 179 | 13  | 0.89 | 110.6            | 6.4  | 60.7     |
| Mid    | 1   | 2     | 250 | 13  | 0.88 | 105.1            | 4.7  | 58.3     |
| Mid    | 2   | 1     | 244 | 12  | 0.93 | 135.8            | 3.3  | 79.2     |
| Mid    | 2   | 2     | 106 | 12  | 0.92 | 132.8            | 3.2  | 78.4     |
| Mid    | 3   | 1     | 226 | 14  | 0.90 | 126.1            | 7.8  | 69.8     |
| Mid    | 3   | 2     | 187 | 14  | 0.87 | 121.4            | 5.2  | 68.0     |
| Min    | 1   | 1     | 178 | 13  | 0.88 | 161.2            | 2.1  | 97.3     |
| Min    | 1   | 2     | 172 | 13  | 0.86 | 167.9            | 2.7  | 96.6     |
| Min    | 2   | 1     | 136 | 12  | 0.87 | 164.8            | 1.7  | 97.0     |
| Min    | 2   | 2     | 167 | 12  | 0.94 | 165.4            | 2.3  | 97.6     |
| Min    | 3   | 1     | 180 | 13  | 0.86 | 171.5            | 2.8  | 99.2     |
| Min    | 3   | 2     | 149 | 14  | 0.85 | 173.3            | 2.7  | 97.0     |

**B. CHEAM3 validation**

*intra-plate controls*

| Signal | Day | Plate | S:N | S:B | Z'   | Avg Signal (RFU) | % CV | % growth |
|--------|-----|-------|-----|-----|------|------------------|------|----------|
| Max    | 1   | 1     | 169 | 12  | 0.89 | 14.6             | 6.5  | 0.0      |
| Max    | 1   | 2     | 161 | 12  | 0.87 | 14.8             | 6.5  | 0.1      |
| Max    | 2   | 1     | 200 | 11  | 0.79 | 14.8             | 6.0  | -0.3     |
| Max    | 2   | 2     | 186 | 11  | 0.70 | 15.0             | 6.1  | -0.4     |
| Max    | 3   | 1     | 273 | 11  | 0.90 | 15.1             | 6.2  | -0.1     |
| Max    | 3   | 2     | 175 | 11  | 0.88 | 15.1             | 6.4  | -0.2     |
| Mid    | 1   | 1     | 245 | 12  | 0.88 | 127.2            | 4.5  | 63.4     |
| Mid    | 1   | 2     | 172 | 12  | 0.79 | 128.2            | 5.3  | 63.9     |
| Mid    | 2   | 1     | 167 | 10  | 0.80 | 145.1            | 5.0  | 90.7     |
| Mid    | 2   | 2     | 177 | 10  | 0.75 | 144.9            | 5.6  | 90.5     |
| Mid    | 3   | 1     | 150 | 11  | 0.91 | 131.1            | 7.7  | 77.3     |

|     |   |   |     |    |      |       |      |       |
|-----|---|---|-----|----|------|-------|------|-------|
| Mid | 3 | 2 | 247 | 10 | 0.90 | 122.5 | 12.3 | 68.1  |
| Min | 1 | 1 | 237 | 12 | 0.93 | 183.3 | 2.8  | 100.4 |
| Min | 1 | 2 | 206 | 12 | 0.86 | 183.1 | 2.5  | 99.7  |
| Min | 2 | 1 | 130 | 10 | 0.78 | 145.9 | 6.1  | 98.3  |
| Min | 2 | 2 | 137 | 10 | 0.75 | 147.6 | 3.7  | 101.2 |
| Min | 3 | 1 | 187 | 11 | 0.88 | 165.7 | 2.7  | 98.2  |
| Min | 3 | 2 | 249 | 11 | 0.88 | 166.6 | 2.5  | 97.6  |

219

220 The Z' factor, an indication of the robustness of the assay (34) was  $\geq 0.7$  in all plates. S:N  
221 was  $> 100$  for both strains and S:B was  $\geq 12$  for *DsRed* and  $\geq 10$  for mCherry. The CV  
222 was  $< 20\%$  in all plate. The average mid-point signal did not vary more than 1.5-fold within  
223 a run or across the three runs. Thus, both assays passed statistical validation.

224

### 225 **High throughput screen**

226 To examine the performance of our high-throughput assay, we tested a set of compounds  
227 with known activity against *M. tuberculosis*. The Tuberculosis Antimicrobial Acquisition  
228 and Coordinating Facility (TAACF) at the Southern Research Institute (SRI) screened  
229 libraries containing over 300,000 compounds to identify inhibitors of *M. tuberculosis*  
230 growth (35, 36). From the hits identified in these two screens a diversity set of 1105  
231 compounds was made obtained from the Division of Microbiology and Infectious Disease  
232 (DMID), National Institute of Allergy and Infectious Diseases (NIAID) as a library of  
233 potential anti-tubercular agents for the further development of *M. tuberculosis* drug  
234 development assays (37). We obtained this set of compounds and tested them in both  
235 HTS-validated assays.

236

237 Compounds were obtained in plates, diluted to 0.35 mg/mL and transferred directly into  
238 assay plates to yield a final assay concentration of 7 µg/mL (final concentration of 2%  
239 DMSO). The standard assay conditions were used for each strain and % growth inhibition  
240 was plotted (Fig 4A and B). The Pearson coefficient, a statistical measurement of  
241 correlation between two data sets, was calculated for each strain. Fig 4A shows the  
242 replicate runs of CHEAM3 with a Pearson coefficient of  $r= 0.9843$ . When DREAM8 was  
243 the strain used in the screen the correlation coefficient was  $r= 0.9855$  (Fig 4B). Thus the  
244 assay performed well in repeat runs with a large compound set.

245 **Fig 4. Small molecule compound library screen:** A selected library of 1105 small  
246 molecules from NIH-SRI/TAACF was screened in replicate experiments against **(A)**  
247 CHEAM3 or **(B)** DREAM8. The % inhibition for each compound was calculated. The  
248 results from the first and second runs are plotted on the x- and y-axis, respectively, for  
249 both strains. For each strain the Pearson coefficient of linear correlation between the two  
250 replicate data sets was calculated in Graphpad Prism and is shown in boxed text in the  
251 upper right corner of each plot. **(C)** Compounds' average % inhibition of CHEAM3 and  
252 DREAM8 growth was calculated and plotted on the x- and y- axis, respectively. The  
253 calculated Pearson co-efficient comparing the data generated from the two different  
254 strains is shown in boxed text in the upper right corner of the plot.

255

256 We compared the data between the two strains of *M. tuberculosis* strains (Fig 4C). There  
257 was a linear relationship between the two strains with a Pearson coefficient of  $r= 0.9074$ .  
258 Thus, there was no statistical difference between the two strains.

259

260 Using CHEAM3, 470 compounds inhibited *M. tuberculosis* growth  $\geq 80\%$  while 169  
261 compounds inhibited  $\geq 99\%$  (Fig 4A). Using DREAM8, 403 compounds inhibited  $\geq 80\%$   
262 growth and 182 compounds inhibited  $\geq 99\%$  growth (Fig 4B). 377 compounds inhibited  
263  $\geq 80\%$  growth in both strains. There were some minor differences between the two strains.  
264 141 compounds showed  $\geq 99\%$  inhibition in both strains, with an additional 69 compounds  
265 with  $\geq 99\%$  in only one of the two strains (41 in DREAM8 and 28 in CHEAM3). However,  
266 of these 69 compounds 64 inhibited growth of the alternate strain by at least 90%. The  
267 hits from the screen were analysed and revealed three chemotypes shown in Fig 5 that  
268 looked most interesting for further development: the phenoxyalkylbenzimidazoles (PAB),  
269 the benzothiophene 1-1 dioxides (BTD), and the piperidinamines (PIP).

270

271 **Fig 5. Selected hit compounds from screen:** Three hit chemotypes identified in our  
272 screen were noted as being especially interesting for further development. Their  
273 structures and MICs are shown.

274

## 275 **DISCUSSION**

276 We developed high throughput assays capable of screening large numbers of compounds  
277 using two fluorescent reporter strains of *M. tuberculosis*. We used both assays to screen  
278 a set of known compounds. Results from these assays were reproducible and the two  
279 strains yielded comparable results.

280

281 Only a fraction of the compounds we tested had activity against *M. tuberculosis* in our  
282 assays, even though these had previously been identified as active (35, 36). A significant

283 difference between the two screens is that we used a lower concentration of 7  $\mu\text{g}/\text{mL}$ , as  
284 compared to 20  $\mu\text{g}/\text{ml}$  previously used; thus we will only detect the more potent  
285 compounds. There are also some technical differences between the two assays, in  
286 particular that we used  $\text{OD}_{590}$  and fluorescence as a measure of increase in bacterial  
287 numbers, whereas the previous screen used Alamar Blue which monitors metabolic  
288 activity.

289  
290 Using our fluorescent reporter strains, we identified 210 compounds that inhibited  $\geq 99\%$   
291 growth, 141 of which inhibited  $\geq 99\%$  growth in both strains. We highlighted three  
292 chemotypes that were most interesting as the phenoxyalkylbenzimidazoles (PAB),  
293 benzothiophene 1-1 dioxides (BTD), and piperidinamines (PIP). We selected these  
294 chemical classes as being novel anti-mycobacterials and we (and others) have  
295 investigated these further in other publications pertaining to their recent characterization  
296 and development.

297  
298 Compounds containing the benzimidazole core have long been known to have broad  
299 spectrum antibacterial activity (38, 39). In the *M. tuberculosis* phenotypic screen  
300 performed by Ananthan et al., 88 compounds with the phenoxyalkylimidazole core were  
301 tested, PAB being the most potent active identified in this series, and the only compound  
302 in that study with benzimidazole substituted for the imidazole (35). There have since been  
303 reports of benzimidazoles having activity against *M. tuberculosis* (40, 41). We  
304 investigated this series and confirmed its potent activity and selectivity (42). We have also

305 shown that this class of compounds targets the electron transport chain, specifically  
306 targeting QcrB (43).

307  
308 The benzothiophene 1-1 dioxides (BTD) series was also highlighted by Ananthan et al.,  
309 as a chemotype. There were only a small number of analogs within this chemotype in  
310 their larger screen, all containing a thioether group at the 3-position and the most potent  
311 being the compound shown in Fig 5. They further noted that there were 40 additional  
312 compounds with the thiopene 1-1 dioxides lacking the benzene substitution in their  
313 primary screen, all of which lacked activity. Using this as a starting point we explored the  
314 BTD series and evaluated their activity against *M. tuberculosis*. We were able to derive  
315 compounds that had good anti-tubercular activity (with MICs of 3-8  $\mu$ M) but were unable  
316 to identify potent compounds analogs that were not cytotoxic to eukaryotic cells (44).

317  
318 Some work has been done on piperidinamine-containing molecules as motilin-receptor  
319 agonists (45) and their clinical development for treating type 1 diabetes (46, 47). Our  
320 screen identified the piperidinamines (PIP) as a potent chemotype. We obtained analogs  
321 within this chemotype that were commercially available and evaluated them for activity  
322 against *M. tuberculosis*, but none showed activity (48). Based on our exploration of  
323 modifications around the piperidine core, we were unable to identify avenues for improved  
324 activity, and to our knowledge, the PIP chemotype has not yet further developed as an  
325 anti-tubercular agent.

326



327 In summary, we have developed and validated a robust whole cell phenotypic assay for  
328 *M. tuberculosis* in 384-well plates using one of two fluorescent reporters with equivalent  
329 outcomes. We used these assays to identify potent inhibitors of *M. tuberculosis* growth  
330 that have since proven to be interesting leads for drug development. This assay provides  
331 robust and reproducible results, and can be a core tool for high-throughput screening of  
332 large chemical libraries for the discovery of novel chemical entities to treat tuberculosis

333

334 **Acknowledgements**

335 None

## 336 **References**

- 337 1. World Health Organization. Global tuberculosis report 2017.
- 338 2. Galandrin S, Guillet V, Rane RS, Leger M, N R, Eynard N, et al. Assay development for  
339 identifying inhibitors of the mycobacterial FadD32 activity. *J Biomolec Screen*. 2013;18(5):576-  
340 87.
- 341 3. Geist JG, Lauw S, Illarionova V, Illarionov B, Fischer M, Grawert T, et al.  
342 Thiazolopyrimidine inhibitors of 2-methylerythritol 2,4-cyclodiphosphate synthase (IspF) from  
343 *Mycobacterium tuberculosis* and *Plasmodium falciparum*. *ChemMedChem*. 2010;5(7):1092-101.
- 344 4. Humnabadkar V, Jha RK, Ghatnekar N, De Sousa SM. A high-throughput screening assay  
345 for simultaneous selection of inhibitors of *Mycobacterium tuberculosis* 1-deoxy-D-xylulose-5-  
346 phosphate synthase (Dxs) or 1-deoxy-D-xylulose 5-phosphate reductoisomerase (Dxr). *J*  
347 *Biomolec Screen*. 2011;16(3):303-12.
- 348 5. Kumar A, Casey A, Odingo J, Kesicki EA, Abrahams G, Vieth M, et al. A high-throughput  
349 screen against pantothenate synthetase (PanC) identifies 3-biphenyl-4-cyanopyrrole-2-carboxylic  
350 acids as a new class of inhibitor with activity against *Mycobacterium tuberculosis*. *PLOS One*.  
351 2013;8(11):e72786.
- 352 6. Mann S, Eveleigh L, Lequin O, Ploux O. A microplate fluorescence assay for DAPA  
353 aminotransferase by detection of the vicinal diamine 7,8-diaminopelargonic acid. *Anal Biochem*.  
354 2013;432(2):90-6.
- 355 7. Simithy J, Reeve N, Hobrath JV, Reynolds RC, Calderon AI. Identification of shikimate  
356 kinase inhibitors among anti-*Mycobacterium tuberculosis* compounds by LC-MS. *Tuberculosis*.  
357 2014;94(2):152-8.
- 358 8. Anthony KG, Strych U, Yeung KR, Shoen CS, Perez O, Krause KL, et al. New classes of  
359 alanine racemase inhibitors identified by high-throughput screening show antimicrobial activity  
360 against *Mycobacterium tuberculosis*. *PLOS One*. 2011;6(5):e20374.

- 361 9. Bhat J, Rane R, Solapure SM, Sarkar D, Sharma U, Harish MN, et al. High-throughput  
362 screening of RNA polymerase inhibitors using a fluorescent UTP analog. *J Biomolec Screen.*  
363 2006;11(8):968-76.
- 364 10. Gutierrez-Lugo MT, Baker H, Shiloach J, Boshoff H, Bewley CA. Dequalinium, a new  
365 inhibitor of *Mycobacterium tuberculosis* mycothiol ligase identified by high-throughput screening.  
366 *Journal of biomolecular screening.* 2009;14(6):643-52.
- 367 11. Sha S, Zhou Y, Xin Y, Ma Y. Development of a colorimetric assay and kinetic analysis for  
368 *Mycobacterium tuberculosis* D-glucose-1-phosphate thymidyltransferase. *J Biomolec Screen..*  
369 2012;17(2):252-7.
- 370 12. Singh U, Sarkar D. Development of a simple high-throughput screening protocol based on  
371 biosynthetic activity of *Mycobacterium tuberculosis* glutamine synthetase for the identification of  
372 novel Inhibitors. *J Biomolec Screen..* 2006;11(8):1035-42.
- 373 13. White EL, Southworth K, Ross L, Cooley S, Gill RB, Sosa MI, et al. A novel inhibitor of  
374 *Mycobacterium tuberculosis* pantothenate synthetase. *J Biomolec Screen..* 2007;12(1):100-5.
- 375 14. Zhao N, Darby CM, Small J, Bachovchin DA, Jiang X, Burns-Huang KE, et al. Target-  
376 based screen against a periplasmic serine protease that regulates intrabacterial pH homeostasis  
377 in *Mycobacterium tuberculosis*. *ACS Chem Biol.* 2015;10(2):364-71.
- 378 15. Santa Maria JP, Jr., Park Y, Yang L, Murgolo N, Altman MD, Zuck P, et al. Linking high-  
379 throughput screens to identify MOAs and novel inhibitors of *Mycobacterium tuberculosis*  
380 dihydrofolate reductase. *ACS Chem Biol.* 2017;12(9):2448-56.
- 381 16. Payne DJ, Gwynn MN, Holmes DJ, Pompliano DL. Drugs for bad bugs: confronting the  
382 challenges of antibacterial discovery. *Nature Rev Drug Disc.* 2007;6(1):29-40.
- 383 17. Gholap S, Tambe M, Nawale L, Sarkar D, Sangshetti J, Damale M. Design, synthesis,  
384 and pharmacological evaluation of fluorinated azoles as anti-tubercular agents. *Archiv der*  
385 *Pharmazie.* 2018;351(2).

- 386 18. Cheng N, Porter MA, Frick LW, Nguyen Y, Hayden JD, Young EF, et al. Filtration improves  
387 the performance of a high-throughput screen for anti-mycobacterial compounds. PLOS One.  
388 2014;9(5):e96348.
- 389 19. Chung GA, Aktar Z, Jackson S, Duncan K. High-throughput screen for detecting  
390 antimycobacterial agents. Antimicrob Ag Chemother. 1995;39(10):2235-8.
- 391 20. Grant SS, Kawate T, Nag PP, Silvis MR, Gordon K, Stanley SA, et al. Identification of  
392 novel inhibitors of nonreplicating *Mycobacterium tuberculosis* using a carbon starvation model.  
393 ACS Chem Biol. 2013;8(10):2224-34.
- 394 21. Deb C, Lee CM, Dubey VS, Daniel J, Abomoelak B, Sirakova TD, et al. A novel in vitro  
395 multiple-stress dormancy model for *Mycobacterium tuberculosis* generates a lipid-loaded, drug-  
396 tolerant, dormant pathogen. PLOS One. 2009;4(6):e6077.
- 397 22. Gold B, Pingle M, Brickner SJ, Shah N, Roberts J, Rundell M, et al. Nonsteroidal anti-  
398 inflammatory drug sensitizes *Mycobacterium tuberculosis* to endogenous and exogenous  
399 antimicrobials. Proc Natl Acad Sci U S A. 2012;109(40):16004-11.
- 400 23. Brodin P, Poquet Y, Levillain F, Peguillet I, Larrouy-Maumus G, Gilleron M, et al. High  
401 content phenotypic cell-based visual screen identifies *Mycobacterium tuberculosis* acyltrehalose-  
402 containing glycolipids involved in phagosome remodeling. PLoS Pathogens. 2010;6(9):e1001100.
- 403 24. Christophe T, Ewann F, Jeon HK, Cechetto J, Brodin P. High-content imaging of  
404 *Mycobacterium tuberculosis*-infected macrophages: an in vitro model for tuberculosis drug  
405 discovery. Future Med Chem. 2010;2(8):1283-93.
- 406 25. Mak PA, Rao SP, Ping Tan M, Lin X, Chyba J, Tay J, et al. A high-throughput screen to  
407 identify inhibitors of ATP homeostasis in non-replicating *Mycobacterium tuberculosis*. ACS Chem  
408 Biol. 2012;7(7):1190-7.
- 409 26. Darby CM, Ingolfsson HI, Jiang X, Shen C, Sun M, Zhao N, et al. Whole cell screen for  
410 inhibitors of pH homeostasis in *Mycobacterium tuberculosis*. PLOS One. 2013;8(7):e68942.

- 411 27. Wang F, Sambandan D, Halder R, Wang J, Batt SM, Weinrick B, et al. Identification of a  
412 small molecule with activity against drug-resistant and persistent tuberculosis. Proc Natl Acad Sci  
413 U S A. 2013;110(27):E2510-7.
- 414 28. Cho SH, Warit S, Wan B, Hwang CH, Pauli GF, Franzblau SG. Low-oxygen-recovery  
415 assay for high-throughput screening of compounds against nonreplicating *Mycobacterium*  
416 *tuberculosis*. Antimicrob Ag Chemother. 2007;51(4):1380-5.
- 417 29. Iøerger TR, Feng Y, Ganesula K, Chen X, Dobos KM, Fortune S, et al. Variation among  
418 genome sequences of H37Rv strains of *Mycobacterium tuberculosis* from multiple laboratories. J  
419 Bacteriol. 2010;192(14):3645-53.
- 420 30. Carroll P, Schreuder LJ, Muwanguzi-Karugaba J, Wiles S, Robertson BD, Ripoll J, et al.  
421 Sensitive detection of gene expression in mycobacteria under replicating and non-replicating  
422 conditions using optimized far-red reporters. PLOS One. 2010;5(3):e9823.
- 423 31. Carroll P, Muwanguzi J, Parish T. Optimization of the DsRed fluorescent protein for use  
424 in *Mycobacterium tuberculosis*. bioRxiv. 2018. <https://doi.org/10.1101/383836>
- 425 32. Ollinger J, Bailey MA, Moraski GC, Casey A, Florio S, Alling T, et al. A dual read-out assay  
426 to evaluate the potency of compounds active against *Mycobacterium tuberculosis*. PLOS One.  
427 2013;8(4):e60531.
- 428 33. Iversen PW, Beck B, Chen Y-F, Dere W, Devanarayan V, Eastwood BJ, et al. HTS Assay  
429 Validation. 2012. In: Assay Guidance Manual [Internet]. Eli Lilly & Company and the National  
430 Center for Advancing Translational Sciences. Available from:  
431 <https://www.ncbi.nlm.nih.gov/books/NBK83783/>.
- 432 34. Zhang JH, Chung TD, Oldenburg KR. A simple statistical parameter for use in evaluation  
433 and validation of high throughput screening assays. J Biomolec Screen. 1999;4(2):67-73.
- 434 35. Ananthan S, Faaleolea ER, Goldman RC, Hobrath JV, Kwong CD, Laughon BE, et al.  
435 High-throughput screening for inhibitors of *Mycobacterium tuberculosis* H37Rv. Tuberculosis.  
436 2009;89(5):334-53.

- 437 36. Maddry JA, Ananthan S, Goldman RC, Hobrath JV, Kwong CD, Maddox C, et al.  
438 Antituberculosis activity of the molecular libraries screening center network library. Tuberculosis  
439 . 2009;89(5):354-63.
- 440 37. Goldman RC, Laughon BE. Discovery and validation of new antitubercular compounds as  
441 potential drug leads and probes. Tuberculosis. 2009;89(5):331-3.
- 442 38. He Y, Wu B, Yang J, Robinson D, Risen L, Ranken R, et al. 2-piperidin-4-yl-  
443 benzimidazoles with broad spectrum antibacterial activities. Bioorg Med Chem Lett.  
444 2003;13(19):3253-6.
- 445 39. Ozkay Y, Tunalı Y, Karaca H, Isikdag I. Antimicrobial activity and a SAR study of some  
446 novel benzimidazole derivatives bearing hydrazone moiety. Eur J Med Chem. 2010;45(8):3293-  
447 8.
- 448 40. Ojima I, Kumar K, Awasthi D, Vineberg JG. Drug discovery targeting cell division proteins,  
449 microtubules and FtsZ. Bioorg Med Chem. 2014;22(18):5060-77.
- 450 41. Gong Y, Somersan Karakaya S, Guo X, Zheng P, Gold B, Ma Y, et al. Benzimidazole-  
451 based compounds kill *Mycobacterium tuberculosis*. Eur J Med Chem. 2014;75:336-53.
- 452 42. Chandrasekera NS, Alling T, Bailey MA, Files M, Early JV, Ollinger J, et al. Identification  
453 of Phenoxyalkylbenzimidazoles with Antitubercular Activity. J Med Chem. 2015;58(18):7273-85.
- 454 43. Chandrasekera NS, Berube BJ, Shetye G, Chettiar S, O'Malley T, Manning A, et al.  
455 Improved phenoxyalkylbenzimidazoles with activity against *Mycobacterium tuberculosis* appear  
456 to target QcrB. ACS Infect Dis. 2017;3(12):898-916.
- 457 44. Chandrasekera NS, Bailey MA, Files M, Alling T, Florio SK, Ollinger J, et al. Synthesis  
458 and anti-tubercular activity of 3-substituted benzo[b]thiophene-1,1-dioxides. PeerJ. 2014;2:e612.
- 459 45. Westaway SM, Brown SL, Fell SC, Johnson CN, MacPherson DT, Mitchell DJ, et al.  
460 Discovery of N-(3-fluorophenyl)-1-[(4-((3S)-3-methyl-1-piperazinyl)methyl)phenyl]acetyl]-4-pi-  
461 peridinamine (GSK962040), the first small molecule motilin receptor agonist clinical candidate. J  
462 Med Chem. 2009;52(4):1180-9.

- 463 46. Chapman MJ, Deane AM, O'Connor SL, Nguyen NQ, Fraser RJ, Richards DB, et al. The  
464 effect of camicinal (GSK962040), a motilin agonist, on gastric emptying and glucose absorption  
465 in feed-intolerant critically ill patients: a randomized, blinded, placebo-controlled, clinical trial. Crit  
466 Care. 2016;20(1):232.
- 467 47. Hellstrom PM, Tack J, Johnson LV, Hacquoil K, Barton ME, Richards DB, et al. The  
468 pharmacodynamics, safety and pharmacokinetics of single doses of the motilin agonist, camicinal,  
469 in type 1 diabetes mellitus with slow gastric emptying. Br J Pharmacol. 2016;173(11):1768-77.
- 470 48. Chandrasekera NS, Alling T, Bailey M, Korkegian A, Ahn J, Ovechkina Y, et al. The 4-  
471 aminopiperidine series has limited anti-tubercular and anti-staphylococcus aureus activity. J  
472 Negat Results Biomed. 2015;14:4.
- 473

**A****excitation optimization**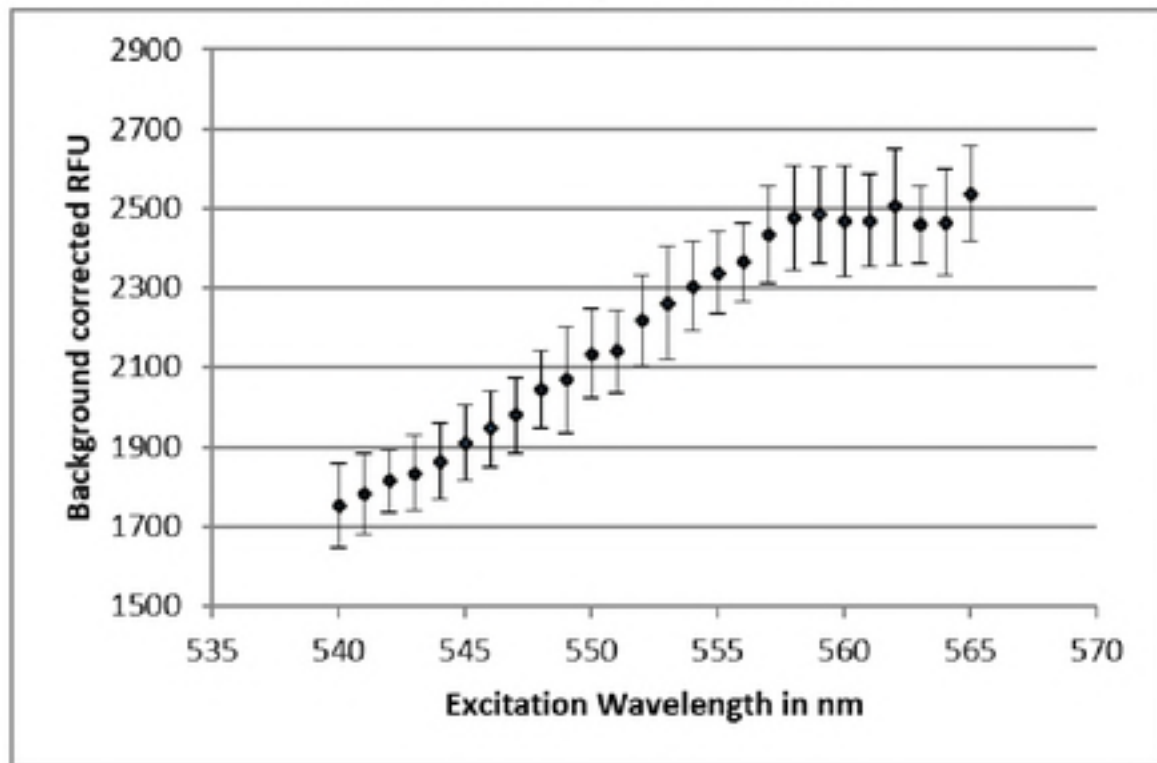**B****emission optimization**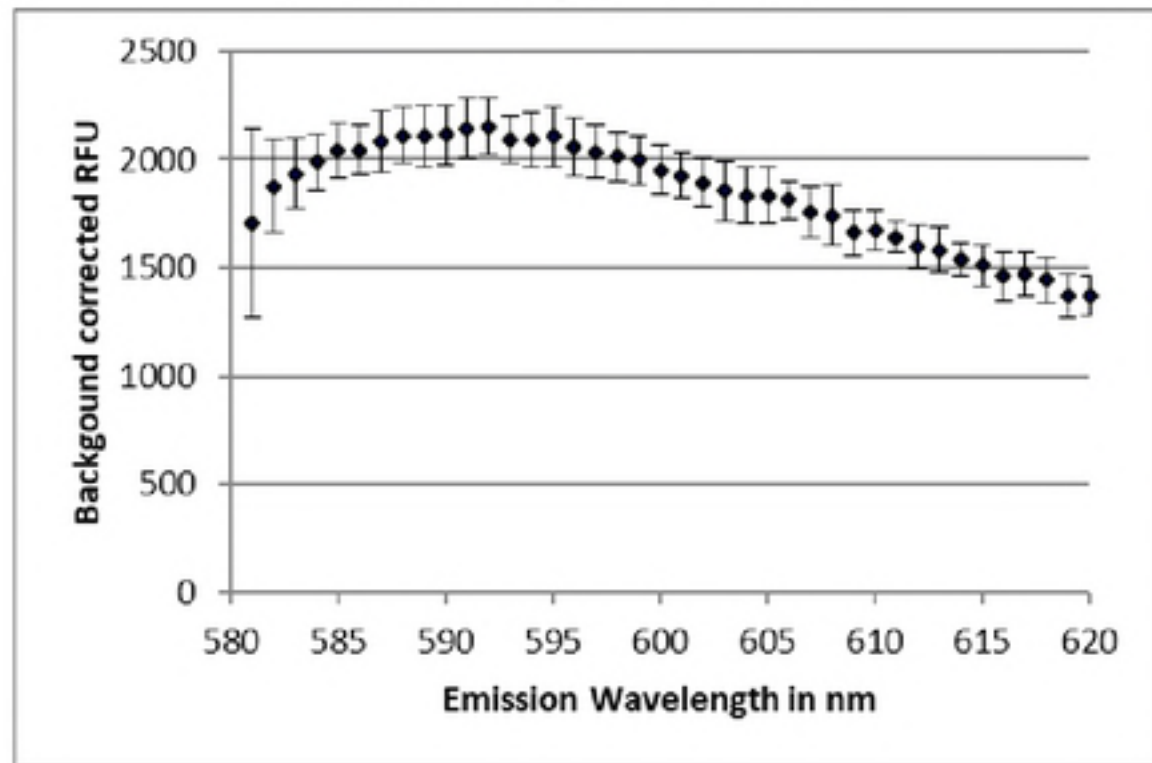



**A**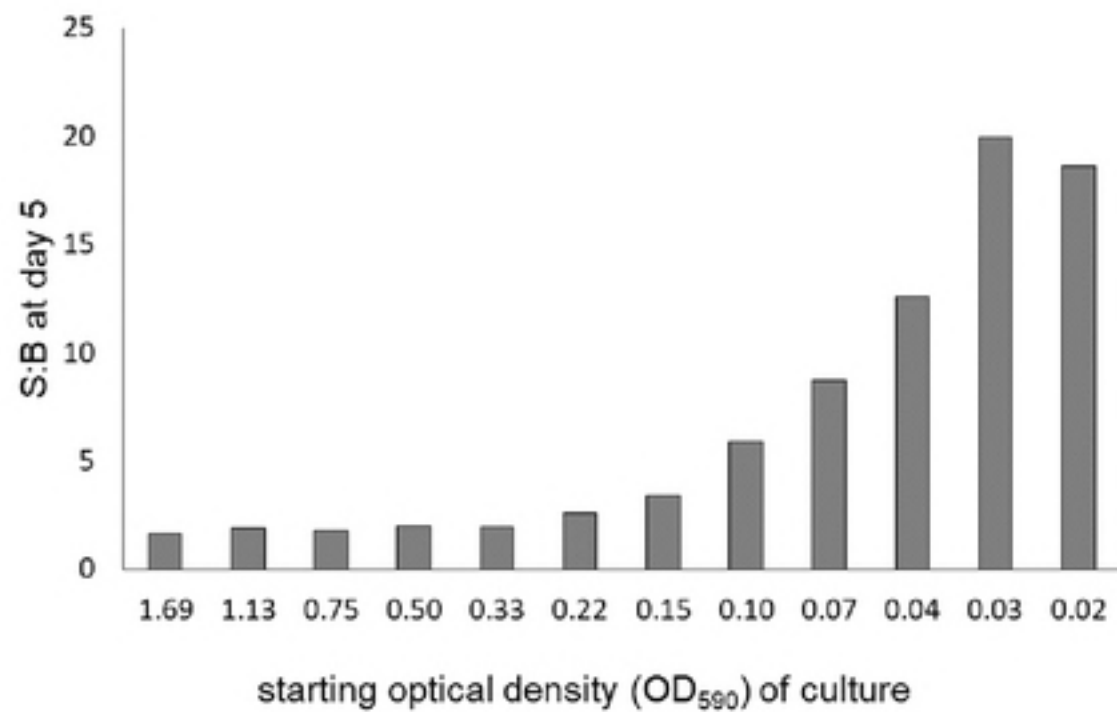**B**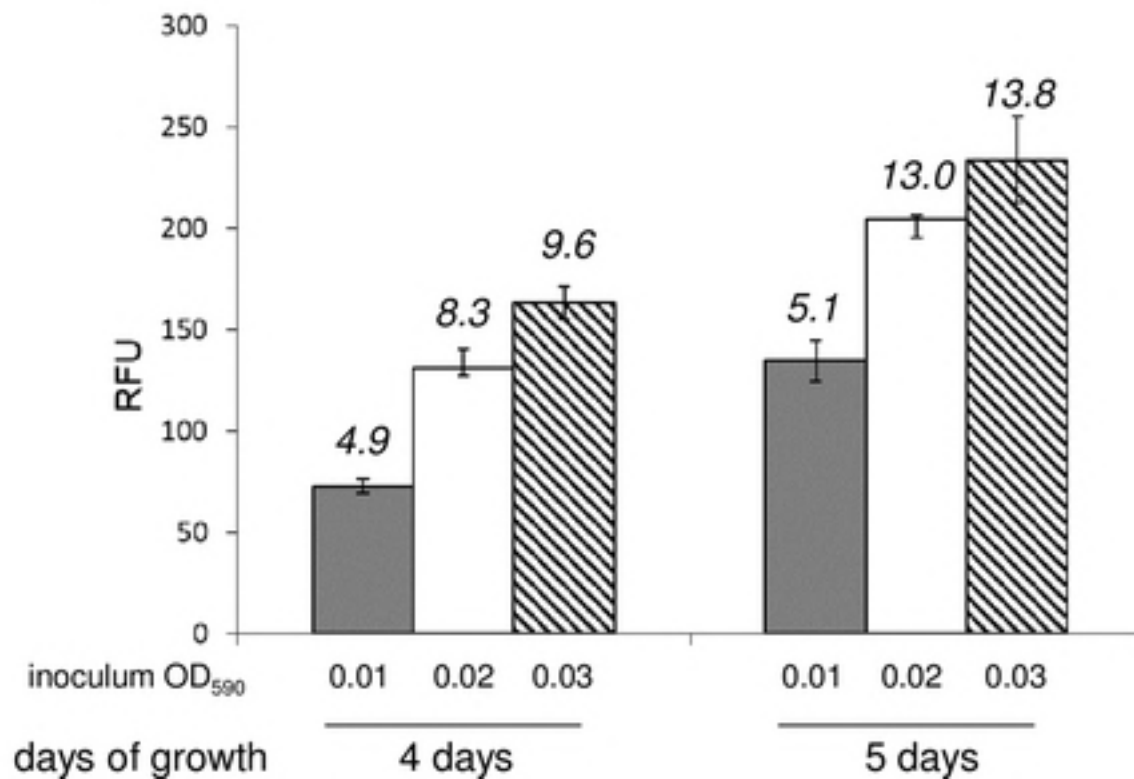

**A**

### DsRed validation

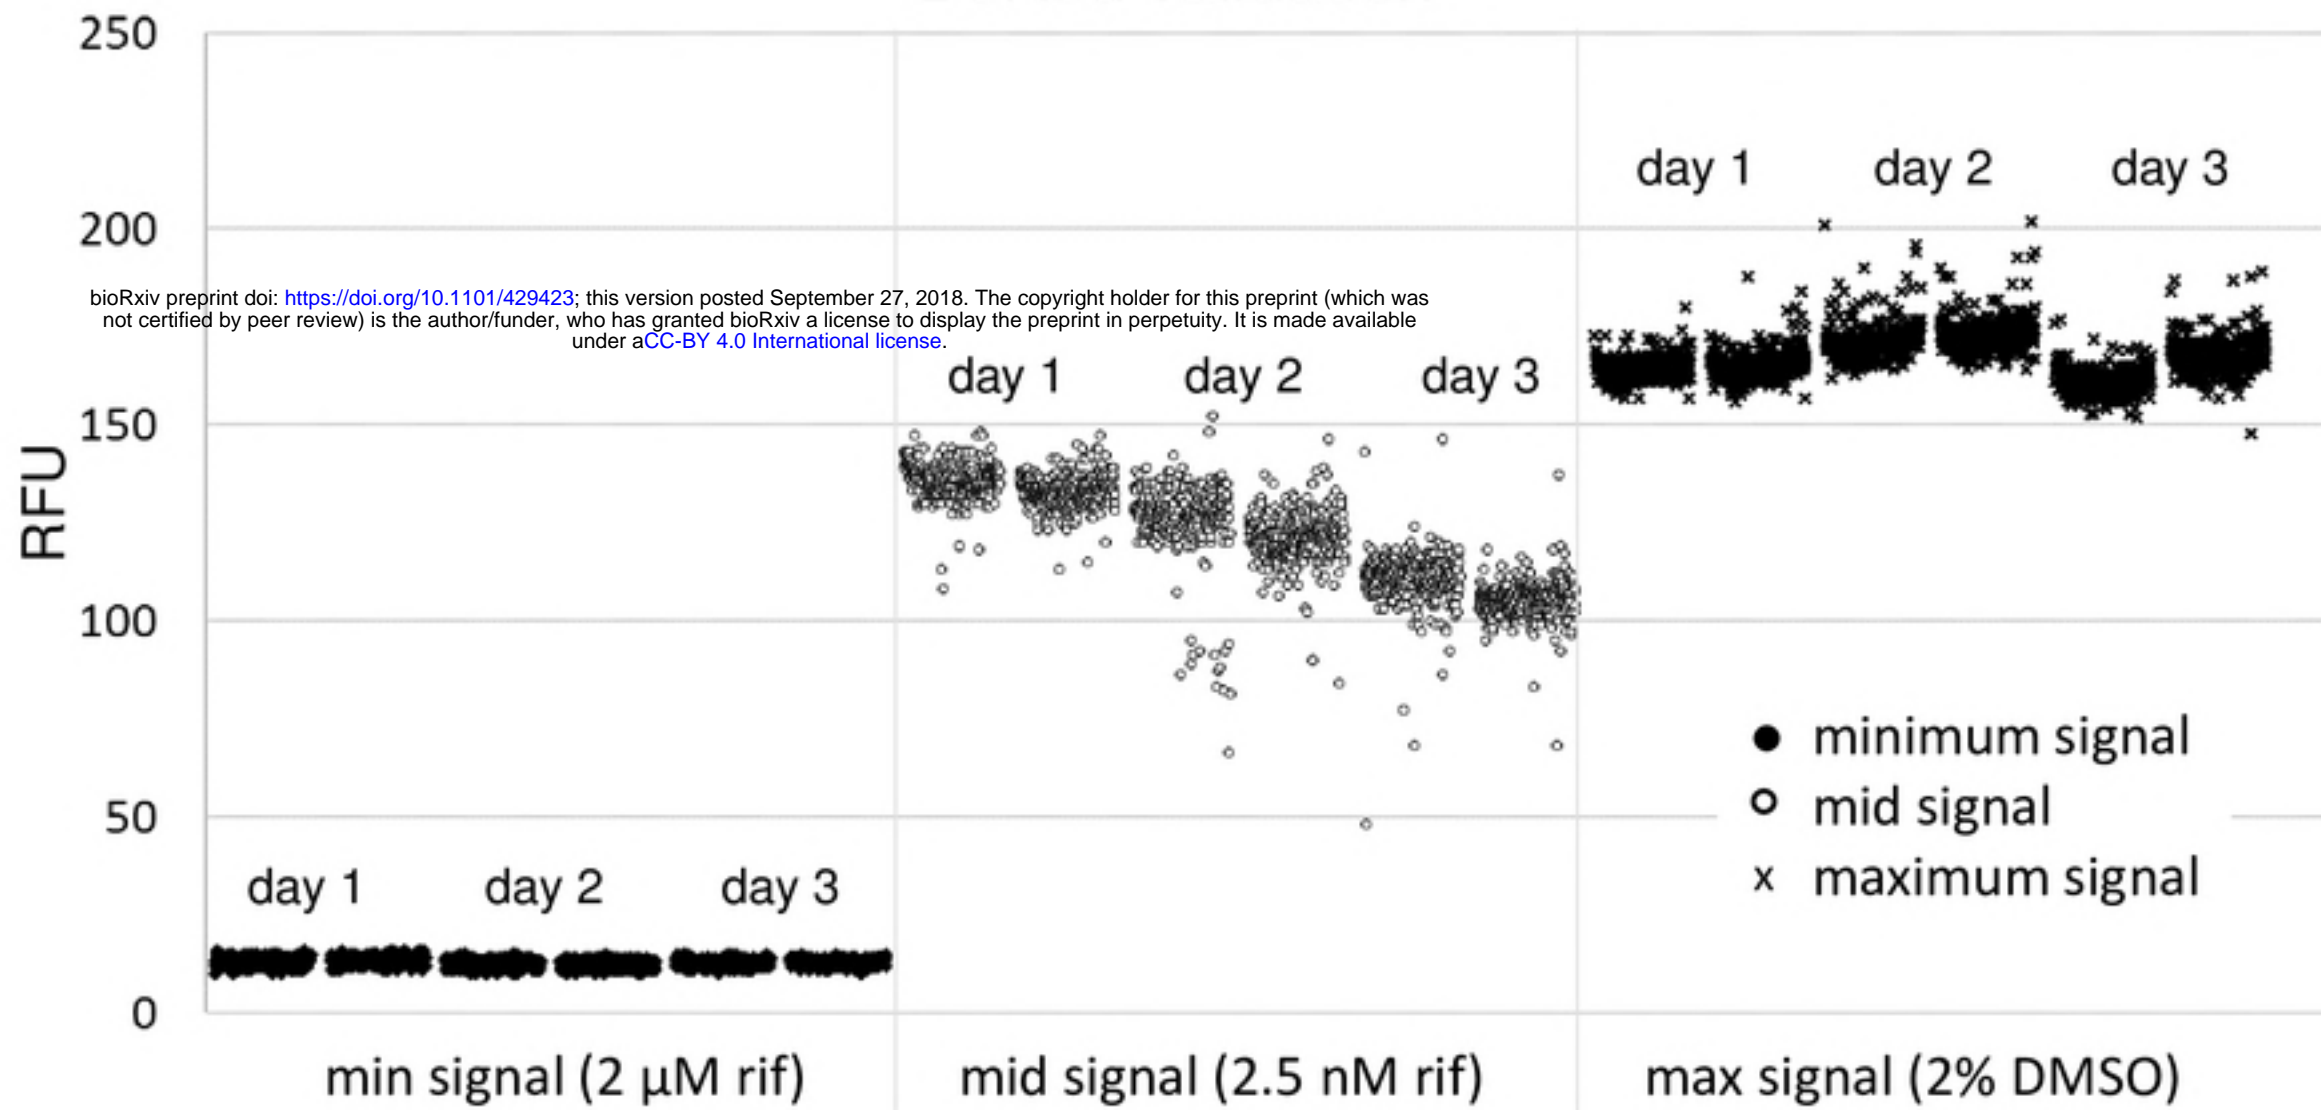**B**

### mCherry validation

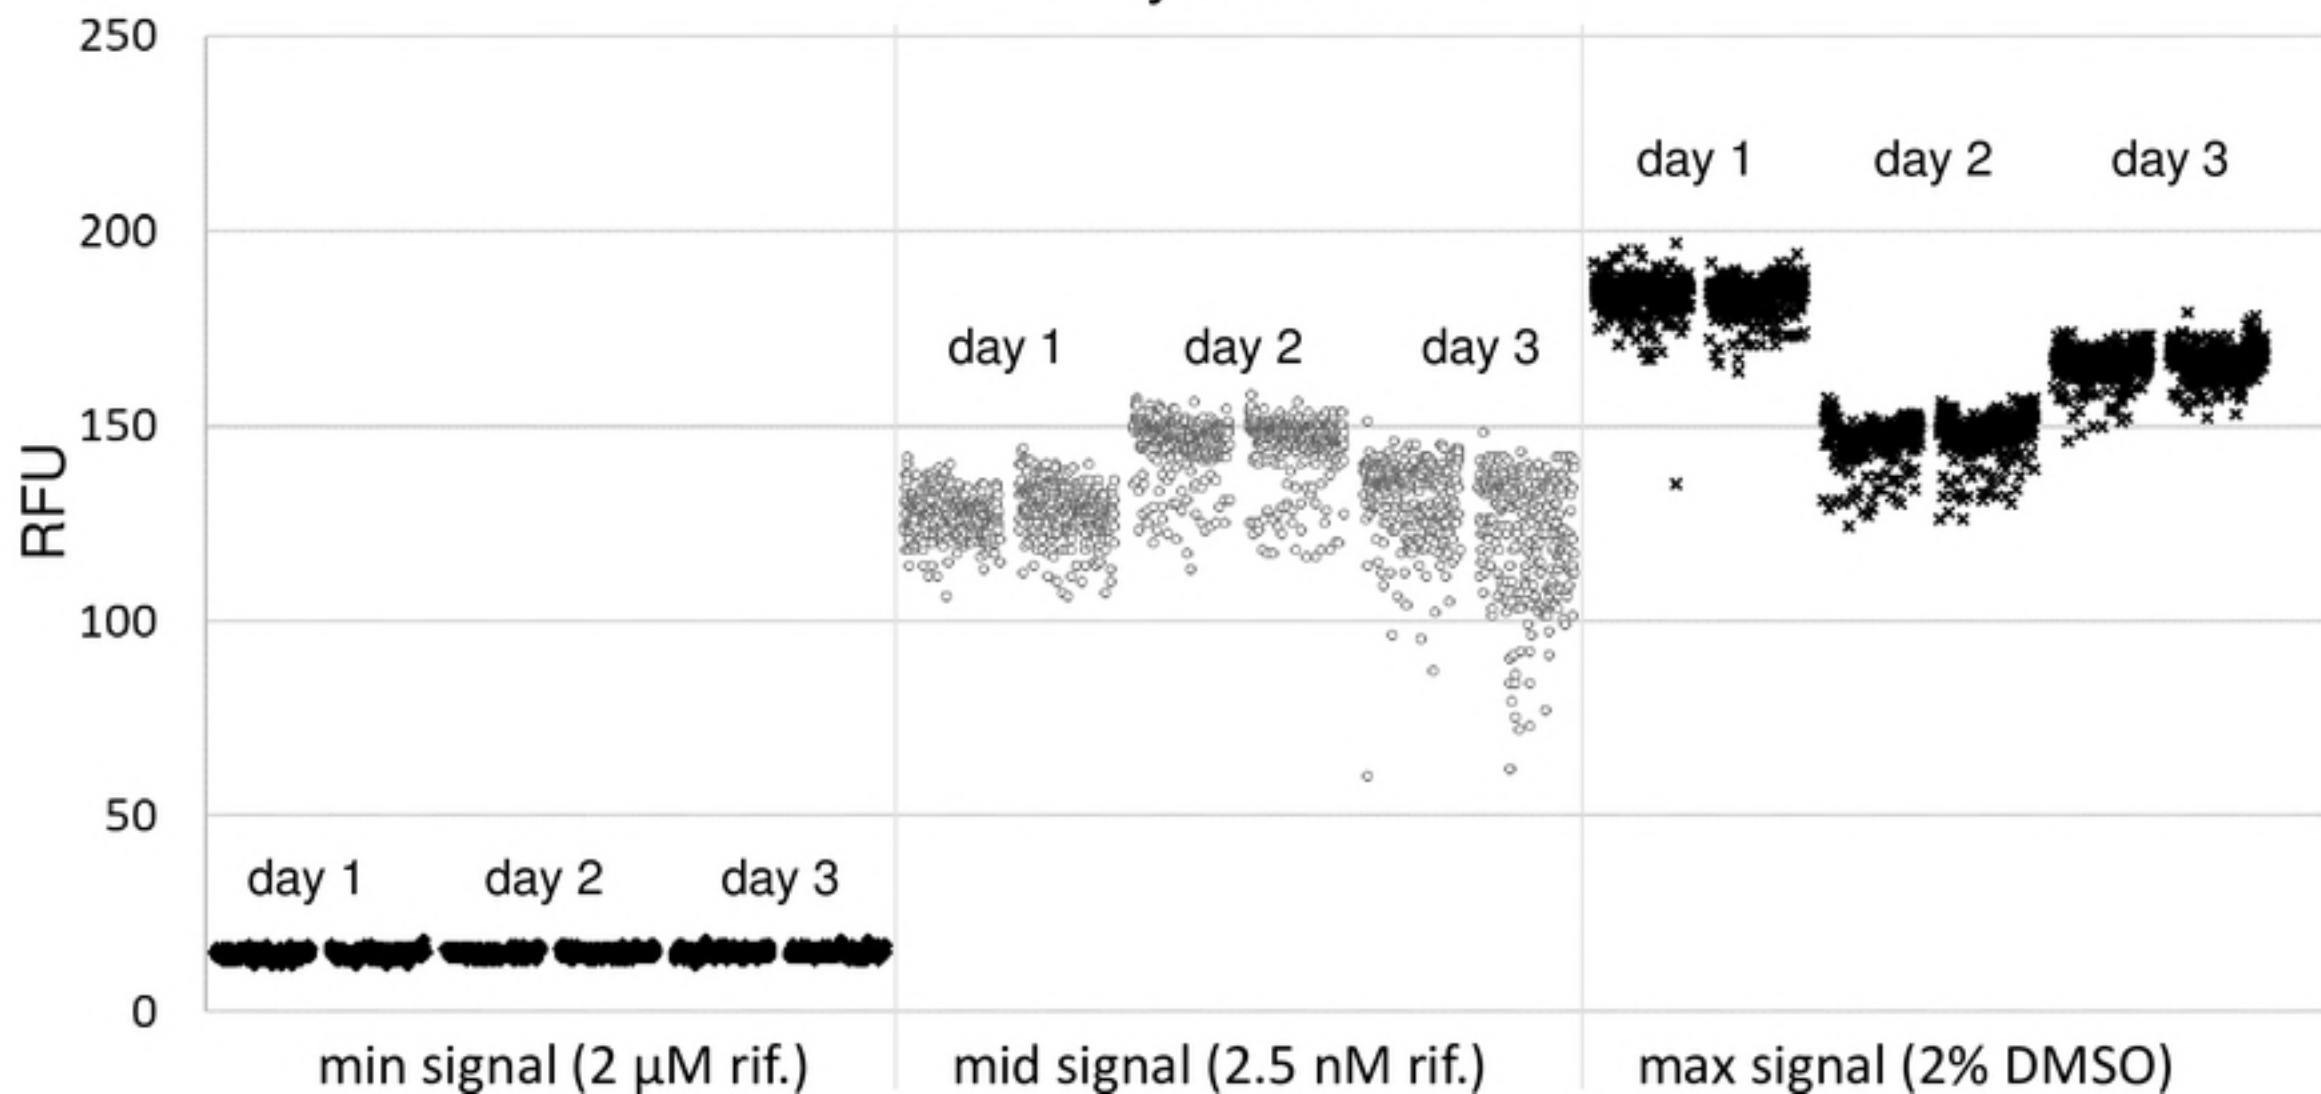

**A****mCherry (CHEAM3)**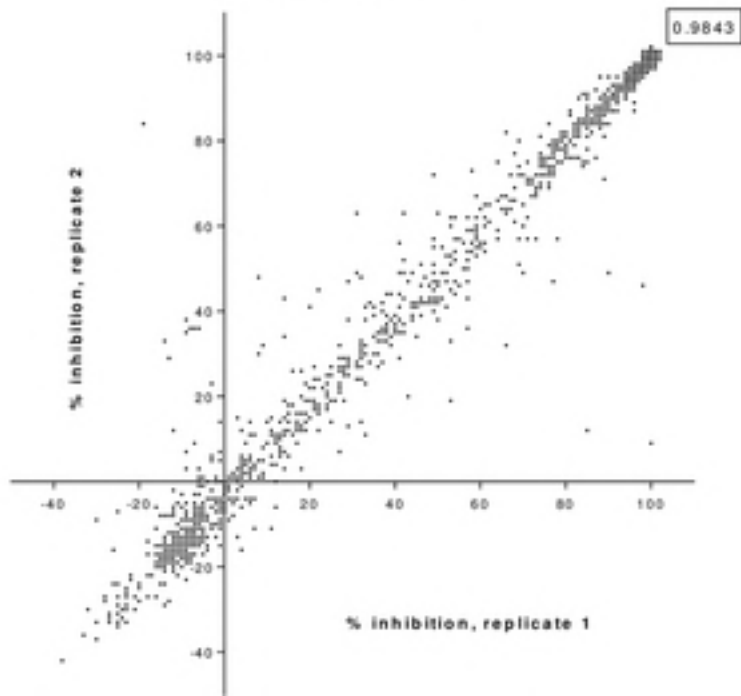**B****DsRed (DREAM8)**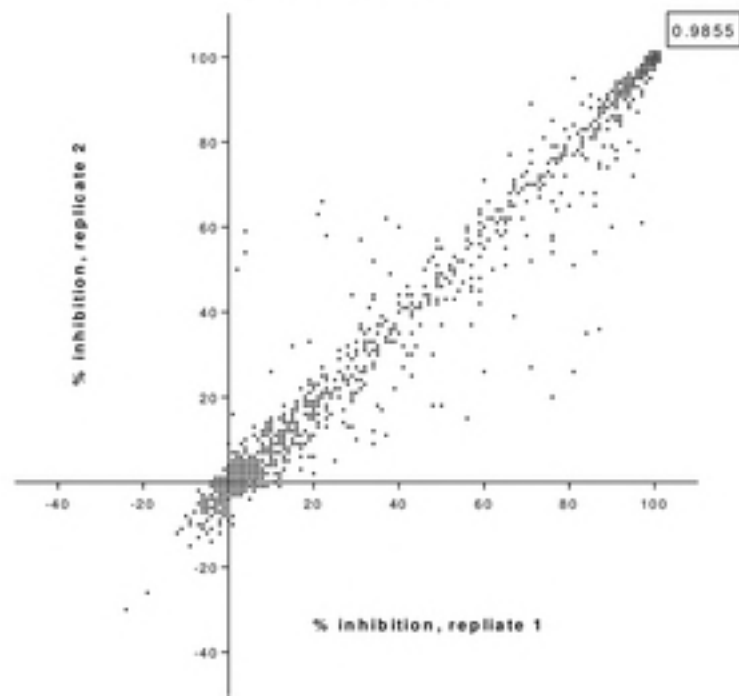**C****CHEAM3 vs DREAM8**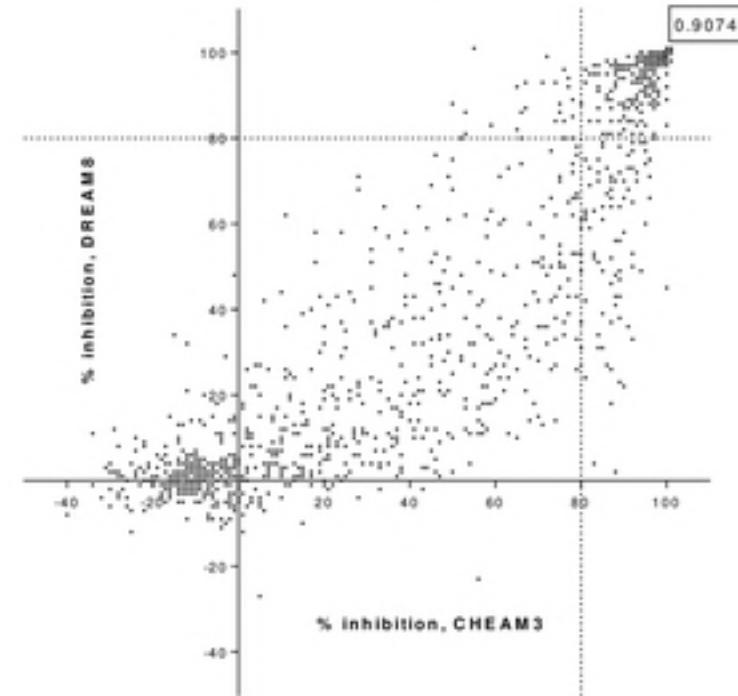

phenoxyalkylbenzimidazole (**PAB**)

MIC =  $5.2 \pm 1.5 \mu\text{M}$  (n=4)

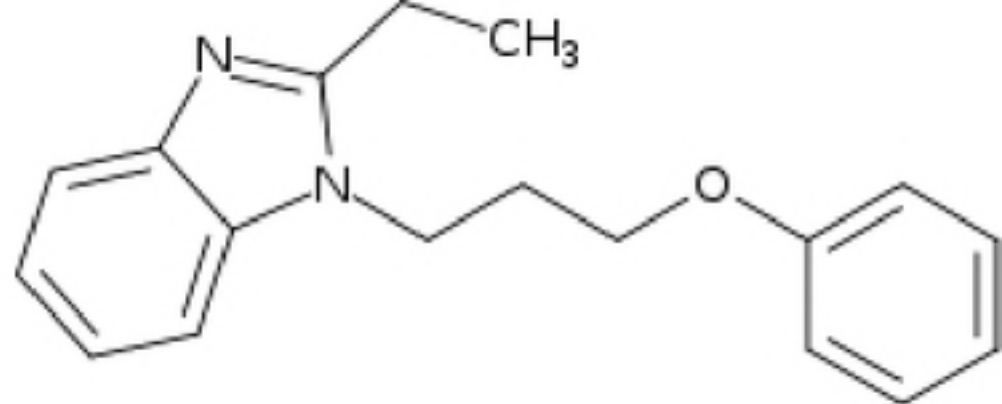

benzothiophene-1,1-dioxide (**BTD**)

MIC =  $3.1 \pm 0.07 \mu\text{M}$  (n=2)

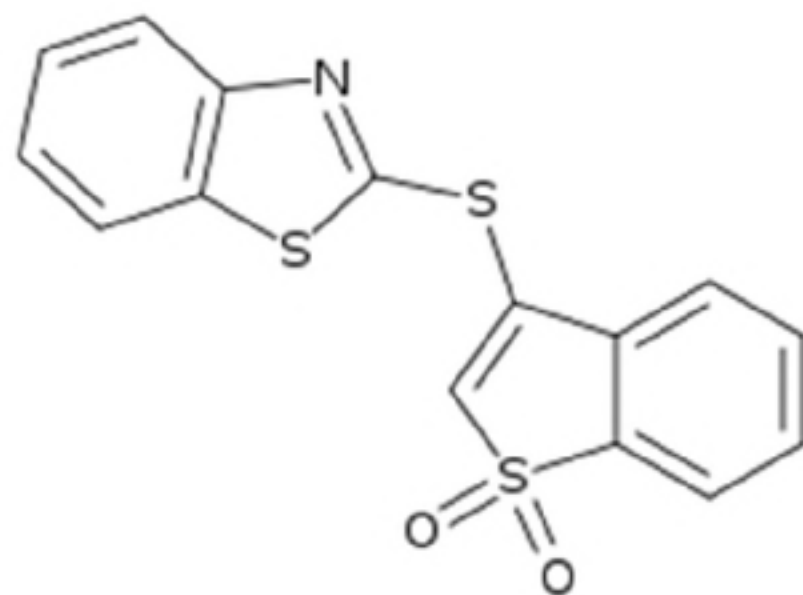

piperidinamine (**PIP**)

MIC =  $9.9 \pm 0.2 \mu\text{M}$  (n=2)

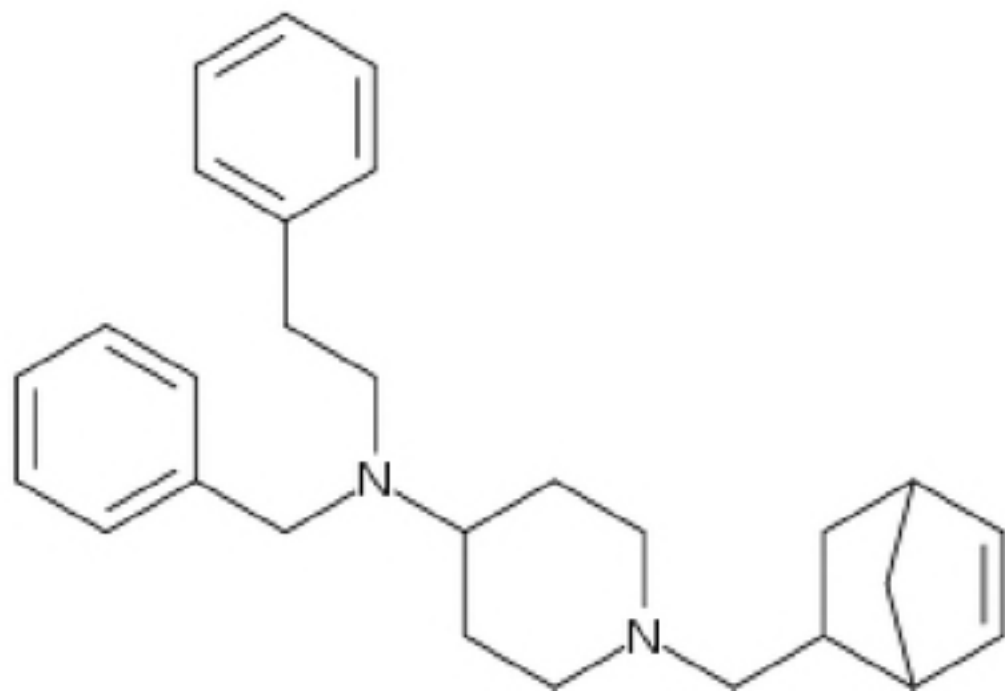

Source: http://biorxiv.org/content/10.1101/429423v1.full.pdf
